# Supplementary material for: Antibacterial and biocompatible ABA-triblock copolymers containing perfluoropolyether and plant-based cardanol for versatile coating applications
Source: Royal Society of Chemistry journal article supplement (doi:10.1039/c7ra07689d), 2017-01-01
Supplement: c7ra07689d1.pdf [file c7ra07689d1.pdf]

[Supporting information]

# Antibacterial and Biocompatible ABA-Triblock Copolymers Containing Perfluoropolyether and Plant-Based Cardanol for Versatile Coating Applications

*Yong-Seok Choi<sup>‡†</sup>, Na Kyung Kim<sup>‡†</sup>, Hyo Kang<sup>††</sup>, Hyun-Ki Jang<sup>§</sup>, Noh, Myungkyung <sup>§</sup>,  
Jinseok Kim<sup>†</sup>, Da-Jung Shon<sup>†</sup>, Byung-Soo Kim<sup>†, §</sup>, and Jong-Chan Lee<sup>\*†</sup>*

*<sup>†</sup>School of Chemical and Biological Engineering and Institute of Chemical Processes, Seoul  
National University, 599 Gwanak-ro, Gwanak-gu, Seoul 151-744, Republic of Korea*

*<sup>††</sup>Dong-A University, 37 Nakdong-Daero 550beon-gil, Saha-gu, Busan 604-714, Republic of  
Korea*

*<sup>§</sup>Interdisciplinary program for bioengineering, Seoul National University, Shilim-9-Dong,  
Gwanak-Gu, Seoul 151-744, Republic of Korea*

*<sup>‡</sup>These authors contributed equally.*

\* Corresponding author: J.-C. Lee (E-mail: [jongchan@snu.ac.kr](mailto:jongchan@snu.ac.kr), Phone: +82 2 880 7070,  
Fax: +82 2 888 1604)

**Synthesis of 2-hydroxy-3-cardanylpropyl methacrylate (HCPM).** To a DMAc solution (30 mL) of cardanol (10 g, 33 mmol) and potassium hydroxide (1.85 g, 33 mmol), glycidyl methacrylate (9.44 g, 66 mmol) was added and reacted in nitrogen (N<sub>2</sub>) atmosphere for 24 h at room temperature. After the reaction was finished with dropping few drops of a concentrated HCl solution, DMAc was evaporated. The crude product was dissolved in methylene chloride (MC) and transferred to a separatory funnel. After extraction with 0.5 N HCl solution, the MC layer was dried over anhydrous magnesium sulfate and filtered. The obtained product was purified by silica gel column chromatography (ethyl acetate : *n*-hexane = 1 : 6 vol%). The yield was 49 % (7.18 g).

<sup>1</sup>H NMR (300 MHz, CDCl<sub>3</sub>, trimethylsilane (TMS) ref):  $\delta$  = 0.88 (t, *J* = 6.78 Hz, 3 H, –CH<sub>3</sub>), 1.20-1.40 (m, CH<sub>3</sub>(CH<sub>2</sub>)<sub>12</sub>CH<sub>2</sub>–), 1.60 (m, 2 H, CH<sub>3</sub>(CH<sub>2</sub>)<sub>12</sub>CH<sub>2</sub>CH<sub>2</sub>–), 1.97 (s, 3 H, –OC(O)C(CH<sub>3</sub>)=CH<sub>2</sub>), 2.02 (m, –CH<sub>2</sub>CH<sub>2</sub>CH<sub>2</sub>CH=CHCH<sub>2</sub>–), 2.57 (t, *J* = 8.04 Hz, 2 H, –OC<sub>6</sub>H<sub>4</sub>CH<sub>2</sub>–), 2.75-2.90 (m, –CH<sub>2</sub>CH=CHCH<sub>2</sub>CH=CH–), 3.94-4.40 (m, 5 H, –OCH<sub>2</sub>CH(OH)CH<sub>2</sub>OC(O)–), 5.20-5.50 (m, –CH<sub>2</sub>CH=CHCH<sub>2</sub>–), 5.62 and 6.26 (s, 2 H, –OC(O)C(CH<sub>3</sub>)=CH<sub>2</sub>), 6.67-6.83 (m, 3 H, aromatic), 7.19 (t, *J* = 7.5 Hz, 1 H, aromatic).

FT-IR: 3471 cm<sup>-1</sup> (O-H stretching vibration), 3010 cm<sup>-1</sup> (C-H vibration of the unsaturated hydrocarbon), 1720 cm<sup>-1</sup> (C=O stretching vibration ( $\alpha,\beta$ -unsaturated ester), 1261 cm<sup>-1</sup> (C(Ar)–O–C asymmetric stretching vibration (*m*-alkyl phenol)), 1049 cm<sup>-1</sup> (C(Ar)–O–C symmetric stretching vibration (*m*-alkyl phenol)), 775 cm<sup>-1</sup> (–CH<sub>2</sub>– rocking vibration), 721 cm<sup>-1</sup> (–(CH<sub>2</sub>)<sub>*n*</sub>–, *n*>3; rocking vibration), 694 cm<sup>-1</sup> (aromatic out of plane C–H deformation vibration of *m*-substituted benzene).

Mass *m/z* calculated C<sub>28</sub>H<sub>44</sub>O<sub>4</sub><sup>+</sup>: 444.32, found 444.

**Table S1. Calculated molecular weight ( $M_n$ ) and content of HCPM in PHCPMF#s**

| Samples  | Calculated $M_n^a$ | Content of HCPM in polymer (wt%) |
|----------|--------------------|----------------------------------|
| PHCPMF2  | 3,700              | 48.6                             |
| PHCPMF4  | 5,400              | 64.8                             |
| PHCPMF12 | 12,300             | 84.6                             |

<sup>a</sup>Determined by <sup>1</sup>H NMR.

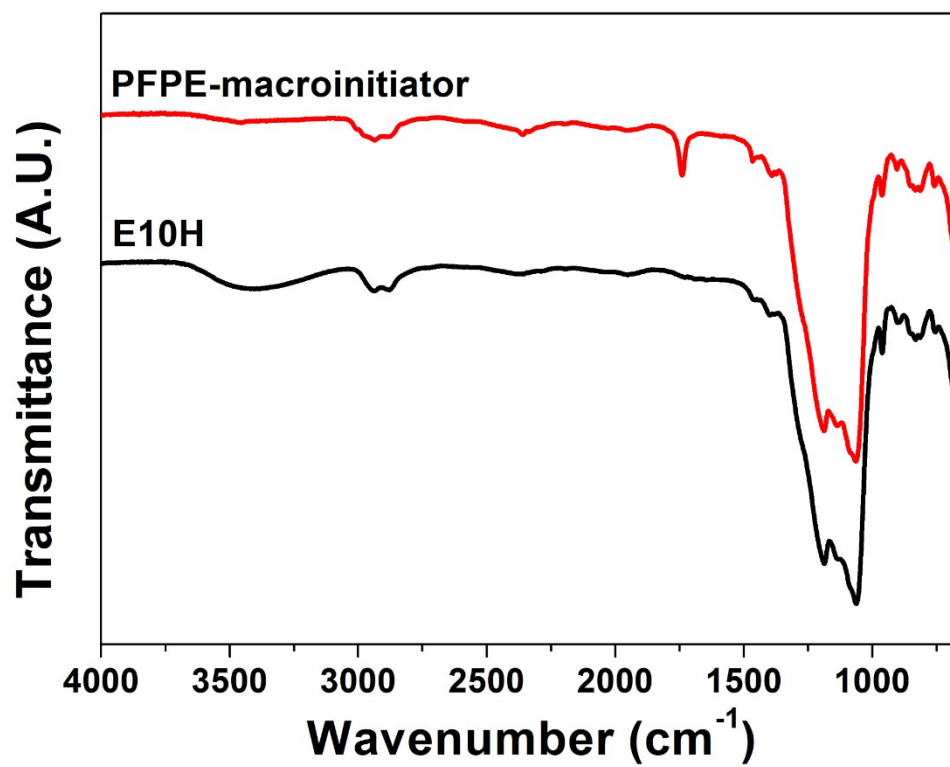

**Figure S1.** FT-IR/ATR spectra of E10H after and before modification.

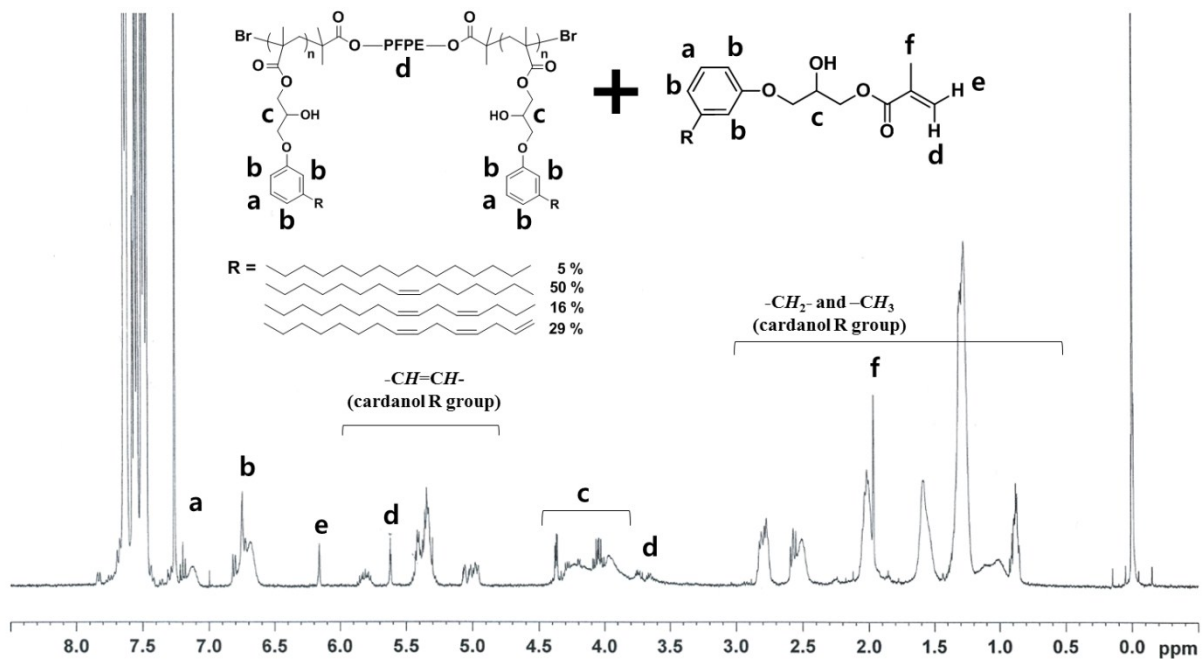

**Figure S2.** <sup>1</sup>H NMR spectrum of crude PHCPMF12 obtained after 18 h polymerization. (Mixture of PHCPMF12 and HCPM)
